1  
2  
3  
4  
5  
6  
7  
8  
9  
10  
11  
12  
13  
14  
15  
16  
17  
18  
19  
20  
21  
22  
23  
24

Unexpected differences in the pharmacokinetics of N-acetyl-DL-leucine enantiomers after oral dosing and their clinical relevance

Grant C. Churchill<sup>1\*</sup>, Michael Strupp<sup>2</sup>, Antony Galione<sup>1</sup> and Frances M. Platt<sup>1</sup>

<sup>1</sup>Department of Pharmacology, University of Oxford, Mansfield Road, Oxford, UK

<sup>2</sup>Department of Neurology and German Center for Vertigo and Balance Disorders, Ludwig Maximilians University Hospital Munich, Munich, Germany

\*Corresponding author

Email: [grant.churchill@pharm.ox.ac.uk](mailto:grant.churchill@pharm.ox.ac.uk) (GCC)

**Running title**

Pharmacokinetics of the N-acetyl-leucine enantiomers

## 25 **Abstract**

26 These results suggest that during chronic administration of the racemate, the D-enantiomer  
27 would accumulate, which could have negative effects. The enantiomers of many chiral drugs  
28 not only exhibit different pharmacological effects in regard to targets that dictate therapeutic  
29 and toxic effects, but are also handled differently in the body due to pharmacokinetic effects.  
30 We investigated the pharmacokinetics of the enantiomers of N-acetyl-leucine after  
31 administration of the racemate (N-acetyl-DL-leucine) or purified, pharmacologically active  
32 L-enantiomer (N-acetyl-L-leucine). Compounds were administered orally to mice. Plasma  
33 and tissue samples were collected at predetermined time points (0.25 to 8 h), quantified with  
34 liquid chromatography/mass spectrometry, and pharmacokinetic constants were calculated  
35 using a noncompartmental model. When administered as the racemate, both the maximum  
36 plasma concentration ( $C_{max}$ ) and the area under the plasma drug concentration over time  
37 curve (AUC) were much greater for the D-enantiomer relative to the L-enantiomer. When  
38 administered as the L-enantiomer, the dose proportionality was greater than unity compared  
39 to the racemate, suggesting saturable processes affecting uptake and/or metabolism.  
40 Elimination ( $k_e$  and  $T_{1/2}$ ) was similar for both enantiomers. These results are most readily  
41 explained by inhibition of uptake at an intestinal carrier of the L-enantiomer by the D-  
42 enantiomer, and by first-pass metabolism of the L-, but not D-enantiomer, likely by  
43 deacetylation. In brain and muscle, N-acetyl-L-leucine levels were lower than N-acetyl-D-  
44 leucine, consistent with rapid conversion into L-leucine and utilization by normal leucine  
45 metabolism. In summary, the enantiomers of N-acetyl-leucine exhibit large, unexpected  
46 differences in pharmacokinetics due to both unique handling and/or inhibition of uptake and  
47 metabolism of the L-enantiomer by the D-enantiomer. Taken together, these results have  
48 clinical implications supporting the use of N-acetyl-L-leucine instead of the racemate or N-  
49 acetyl-D-leucine, and support the research and development of isolated N-acetyl-L-leucine.

50

## 51 **Introduction**

52 N-acetyl-leucine has been used as an over-the-counter drug for the treatment of vertigo since  
53 1957. One assumed mode of action is normalization of neuronal membrane potential and  
54 excitability as was demonstrated in an animal study [1]. Recently, N-acetyl-leucine has  
55 experienced a renaissance with renewed interest from both academia and industry as it is a  
56 promising treatment for several disorders with unmet medical needs including cerebella  
57 ataxia [2–5], cognition and mobility in the elderly [6], lysosomal storage disorders [7,8] and  
58 migraine [9]. Given its broad therapeutic potential, aspects of N-acetyl-leucine's  
59 pharmacodynamics and pharmacokinetics warrant further exploration.

60

61 As N-acetyl-leucine is an analogue of the alpha amino acid leucine, it has a stereocentre and  
62 thus a pair of enantiomers (Fig 1). Enantiomers are isomers, compounds with the same  
63 molecular formula but which differ in the arrangement of their atoms in space, having one  
64 chiral stereocentre with four different substituents that yields two non-superimposable mirror  
65 image molecules (Fig 1). Often the pharmacological activity of a drug resides with a single  
66 enantiomer because living systems are chiral and formed from chiral constituents [10]. Thus,  
67 proteins made from L-amino acids are chiral and show stereoselective binding of drugs to  
68 transporters, receptors and enzymes. Stereoselective binding can be trivial or profound: S-  
69 asparagine is sweet whereas R-asparagine is bitter; R-thalidomide is a sedative whereas the  
70 S-form is teratogenic [11]. The thalidomide tragedy shifted the importance of drug chirality  
71 from inconsequential to crucial [12] as reflected by the current requirements for developing  
72 single enantiomers in drug development and regulatory approval [13,14]

73

74 **Fig 1. Chemical structure of N-acetyl-leucine. (a)** Stereochemistry of the enantiomers. **(b)**

75 Amide resonance structures showing similarity to an imine. Extending from the tetrahedral  
76 chiral carbon is a solid wedge to indicate a bond projecting above the plane of the paper and a  
77 hashed wedge to indicate a bond projecting below the plane of the paper.

78

79 The effects of chirality on drug behaviour has shifted from nice to know to effectively need  
80 to know for informed dosing and regulatory compliance, safety and efficacy. As N-acetyl-  
81 leucine was developed before realization of the importance of drug chirality, it was and  
82 continues to be marketed as a racemate (Tanganil<sup>®</sup>, Laboratoires Pierre Fabre)[15].

83 Subsequent studies in models of vertigo on the individual enantiomers have revealed that the  
84 therapeutic effects of N-acetyl-DL-leucine are due to the L-enantiomer [16,17]. This means  
85 that, as expressed by Ariens [12] for chiral drugs in general, the racemic mixture (N-acetyl-  
86 DL-leucine) is in fact two drugs (the L-enantiomer and the D-enantiomer), each with distinct  
87 properties with one (N-acetyl-D-leucine) at best does not contribute to the therapeutic  
88 response, and at worst potentially responsible for toxicity, as this inactive enantiomer  
89 provides ‘therapeutic ballast’ [18].

90

91 Chirality affects not only the pharmacodynamic properties of potency, efficacy and affinity, it  
92 also affects pharmacokinetic processes of absorption, distribution, metabolism and excretion  
93 [18,19]. Accordingly, both the US Food and Drug Administration’s Guidance for Industry on  
94 the Development of New Stereoisomeric Drugs [13] and the European Medicines Agency  
95 [14] advises that when a single enantiomer has been found to be the pharmacologically active  
96 ingredient of a racemic mixture, it is important to not only characterize the pharmacokinetic  
97 of the active enantiomer, but also the effects of the inert member of the stereoisomer pair to

98 determine if there are potential risks with administering the racemate, or benefits associated  
99 with the use of the single active enantiomer.

100

101 With the above as background regarding safety and efficacy of racemic drugs, and the fact  
102 that no data has been published on the pharmacokinetics of the enantiomers of N-acetyl-  
103 leucine, we investigated the pharmacokinetics of the racemate (an equal mixture of D and L)  
104 as well as the pharmacologically active L-enantiomer alone. We report significant and  
105 unexpected differences in the pharmacokinetics of the enantiomers.

106

## 107 **Materials and Methods**

### 108 **Animal ethics approval**

109 The study was conducted under the project licence ESAVI/3047/04.10.07/2016, approved by  
110 the national Animal Experiment Board of Finland under Directive 2010/63/EU of the  
111 European Parliament and of the Council of 22 September 2010 on the protection of animals  
112 used for scientific purposes, with the following national provisions: Act (497/2013) and  
113 Decree (564/2013) on the Protection of Animals Used for Scientific or Educational Purposes.

114

115 Animals were purchased from Scanbur (Denmark) and allowed to acclimatise for at least 5  
116 day before the experiment. The animals were weighed on the day prior to dosing. The  
117 compound was administered to male BALB/c mice (n=3 per time point) p.o. (100 mg/kg; 10  
118 mL/kg) by oral gavage. Blood samples were collected into potassium EDTA tubes by  
119 venepuncture from the saphenous vein. Within 30 min following the sampling, blood was  
120 centrifuged for plasma separation (room temperature; 10 min; 2700 xg). The plasma samples  
121 were transferred into plastic tubes, frozen and stored at -20°C.

122

## 123 **Chemicals and suppliers**

124 HPLC grade methanol and acetonitrile were from Merck (Darmstadt, Germany). HPLC grade  
125 formic acid, acetic acid and ammonium formate were from BDH Laboratory Supplies (Poole,  
126 UK). Other chemicals were from Sigma Aldrich (Helsinki, Finland), and of the highest purity  
127 available. Water was from a Direct-Q3 (Millipore Oy, Espoo, Finland) purification system  
128 and UP grade (ultrapure, 18.2 MW). N-acetyl-DL-leucine was obtained from Molekula  
129 (#73891210) and N-acetyl-L-leucine was obtained from Sigma Aldrich (#441511).

130

## 131 **Sample preparation**

132 The plasma samples were prepared for analysis by mixing 50  $\mu$ L of plasma with 100  $\mu$ L of  
133 acetonitrile and mixed. The samples were transferred to Waters 96-well plate and the sample  
134 was evaporated under nitrogen gas flow. The sample was reconstituted into 150  $\mu$ L of 50%  
135 methanol:water and analysed by LC/MS. Standard plasma samples were prepared by spiking  
136 the injection solution with concentrations from 1 to 10 000 ng/mL by using one volume of  
137 spiking solution and nine volumes of injection solution. These samples were then prepared  
138 for analysis in the same way as the samples. Quality control (QC) samples were prepared  
139 both from racemic-N-Acetyl-Leucine and from N-Acetyl-L-Leucine in two different  
140 concentrations. QC samples from racemic-N-Acetyl-Leucine were prepared into  
141 concentrations of 40, 400 and 4000 ng/mL, corresponding to 20, 200 and 200 ng/mL  
142 concentration of both D- and L-enantiomers, respectively. QC samples of N-Acetyl-L-  
143 Leucine was then prepared into concentrations of 20, 200 and 2000 ng/mL. QC samples were  
144 then prepared for analysis in the same way as the samples.

## 145 **Quantitation with liquid chromatography-mass spectrometry and** 146 **chiral-HPLC**

147 Quantitation by HPLC was performed using a Supelco Astec CHIROBIOTIC T chiral HPLC  
148 column (2.1 x 150 mm, 5  $\mu$ m particle size) with a Waters Acquity UPLC + Thermo Q-  
149 Exactive hybrid Orbitrap MS, using ESI negative polarity, nitrogen auxiliary gas (450°C),  
150 capillary voltage was 2000 and 350°C and controlled with the software Xcalibur 4.1.  
151 Samples were injected as a 4- $\mu$ L volume and eluted with a gradient of buffer A (20 mM  
152 ammonium acetate) and buffer B (methanol) with a flow rate of 0.3 mL/min and column  
153 oven temperature of 30°C. The gradient was 80% A at 0 min; 20% A at 3.5 min and 80% A  
154 at 4.5 min Parallel Reaction Monitoring (PRM) and Full-MS-dd-MS2 were measured at the  
155 same time. In PRM, quadrupole was used as a mass filter and depending whether deuterated  
156 or non-deuterated N-Acetyl-L-Leucine was detected, either m/z 172 or 176 only got through.  
157 Ions with aforementioned m/z was then collided and leucine fragment (m/z 130 or 134) was  
158 used in quantitation. In full-MS-dd-MS2 mode, every ion with intensity over certain intensity  
159 was collided and fragments analyzed.

160

## 161 **Metabolite identification with reverse phase ultrahigh** 162 **performance liquid chromatography**

163 Metabolite identification was performed using a Waters Acquity UPLC + Thermo Q-  
164 Exactive hybrid Orbitrap MS and a Waters Acquity HSS T3 column (50 x 2.1 mm, 1.8  $\mu$ m  
165 particle size). MS was as described above over the mass range of 70–1000 using an  
166 acquisition time of 7 Hz for full scan, IT 100 ms for DDI MS/MS, an AGC Target of 1E6,  
167 maximum IT of 100 ms and 35 000 (FWHM @ m/z 200) for full scan, 17 500 for MS/MS in  
168 DDI mode off for full scan; 20+40+60 for DDI MS/MS inclusion list for expected

169 metabolites ON; also other unexpected most abundant metabolites chosen for MS/MS.  
170 Samples were injected as a 4- $\mu$ L volume and eluted at a flow rate of 0.5 mL/min and a  
171 column oven temperature of 35°C with a gradient consisting of Buffer A 0.1% formic acid  
172 and Buffer B acetonitrile. The gradient was (min, %A): 0, 98; 0.5, 98; 2, 50; 3, 5 and 3.5, 5.  
173 Ion chromatograms were extracted from the total ion chromatograms using calculated  
174 monoisotopic accurate masses with 10 mDa window. The metabolites were mined from the  
175 data using software-aided data processing (Thermo Compound Discoverer 2.0 including  
176 structure-intelligent dealkylation tool & mass defect filter) with manual confirmation.  
177

## 178 **Pharmacokinetic calculations**

179 Plasma pharmacokinetic parameters of the N-acetyl-leucine enantiomers were calculated  
180 using Phoenix 64 (Build 6.4.0.768) WinNonlin (version 6.4) software, using non-  
181 compartmental method with sparse sampling. Nominal doses were used for all animals. The  
182 terminal phase half-life ( $T_{1/2}$ ), the time for 50% of the plasma concentration to decrease after  
183 some point of elimination, was calculated by least-squares regression analysis of the terminal  
184 linear part of the log concentration–time curve using the relationship  $0.693/k_e$ . The area under  
185 the plasma concentration–time curve (AUC), an estimation of plasma drug exposure over  
186 time, was determined with the linear trapezoidal rule for increasing values and log  
187 trapezoidal rule for decreasing values up to the last measurable concentration ( $AUC_{0-last}$ ). The  
188 first order elimination rate constant  $k_e$  was calculated as the slope (minimum 3 points) from  
189 the terminal log plasma concentration time curve. The maximum concentration ( $C_{max}$ ) and the  
190 time taken to achieve the peak concentration ( $T_{max}$ ) after oral dose were obtained directly  
191 from the plasma concentration data without interpolation. The theoretical background and  
192 interpretation of the pharmacokinetic data was based on [20]. Where appropriate, data are  
193 expressed as the mean  $\pm$  standard error of the mean. Means were statistically analysed by



194 either pre-planned t tests or a one-sample t test comparing the measured value with the  
195 expected value. Graphs were plotted using Prism 7 (GraphPad Software Inc) and organized  
196 and formatted in Illustrator (Adobe Inc).

197

## 198 **Results**

### 199 **N-acetyl-D-leucine exhibits larger $C_{\max}$ and AUC following** 200 **racemate administration**

201 To determine whether the enantiomers of N-acetyl-leucine have different pharmacokinetics,  
202 we orally dosed mice with either a racemate or the L-enantiomer (Fig 2 and S1 Fig).  
203 Following an oral dose of N-acetyl-DL-leucine (100 mg/kg and 10 mg/mL), in the plasma,  
204 the concentration of the D-enantiomer was greater than the L-enantiomer at all time points  
205 (Fig 3a). This asymmetry in the plasma concentrations of the D- and L-enantiomers can be  
206 quantitated by comparing, respectively,  $C_{\max}$  of 86100 ng/mL versus 3410 ng/mL (Fig 5a and  
207 Table 1) and AUC of 75800 h\*ng/mL versus 2560 h\*ng/mL (Fig 5d and Table 1). The  
208 elimination rate was similar for both enantiomers, indicated by the linear and parallel curves  
209 on a semilog graph (Fig 3b) using a noncompartmental model giving a  $k_e$  of 2.2 h<sup>-1</sup> for the D-  
210 enantiomer and 2.8<sup>-1</sup> h for L-enantiomer (Fig 5c and Table 1), with corresponding  $T_{1/2}$  values  
211 of 0.31 h and 0.40 h (Fig 5e and Table 1). The D-enantiomer remained detectable until 8 h  
212 (Fig 5g) with the last concentration of 247 ng/mL (Fig 5f). In contrast, the L-enantiomer  
213 remained detectable until 2 h (Fig 5g) with the last concentration of 623 ng/mL (Fig 5f).

214

215 **Fig 2. Schematic outlining the experimental procedure.** Male mice were orally  
216 administered N-acetyl-leucine as either the racemate (50% each enantiomer) or purified L-  
217 enantiomer (2.6% D-enantiomer and 97.4% L-enantiomer). At specific times (0.25 to 8 h)

218 after administration, blood was taken, plasma was separated and quantified by chiral liquid  
219 chromatography/mass spectrometry. Plots of the plasma concentration of each enantiomer  
220 over time were used to visualize pharmacokinetics and a noncompartmental model was used  
221 to calculate the pharmacokinetic parameters  $C_{\max}$  (maximum peak concentration),  $T_{\max}$  (time  
222 to reach  $C_{\max}$ ),  $k_e$  (first order elimination rate constant),  $T_{1/2}$  (half-life) and AUC (area under  
223 the curve). Samples of brain and skeletal muscle were also taken at specific times and used to  
224 determine compound distribution and to search for metabolites with high-resolution mass  
225 spectrometry.

226

227 **Fig 3. Graphs of plasma concentration of enantiomers versus time after administration**  
228 **of racemic N-acetyl-DL-leucine or purified N-acetyl-L-leucine.** Data are presented as (a,c)  
229 linear-linear plots or (b,d) semilog plots. Values are the mean  $\pm$  standard error of the mean  
230 with  $n = 3$  (mice).

231 **Fig 5. Bar charts showing the pharmacokinetic parameters for the enantiomers of N-**  
232 **acetyl-L-leucine after administration of racemic N-acetyl-DL-leucine (denoted as DL) or**  
233 **N-acetyl-L-leucine (denoted as L).** (a-g) Conventional pharmacokinetic parameters  
234 calculated from the plasma concentration of drug. (h-j) Parameters derived from the  
235 conventional pharmacokinetic parameters to detect and highlight the effects of  
236 pharmacokinetic differences between the enantiomers. Values are the mean  $\pm$  standard error  
237 of the mean with  $n = 3$  (mice). Means were statistically analysed by either (a-g) pre-planned t  
238 tests or (h and i) a one-sample t test comparing the measured value with the expected value:  
239 1 when administered as DL and 36 when administered as purified L. The means compared  
240 are indicated by the horizontal lines on the charts, and exact p values are provided for the  
241 comparisons.

242

## 243 **Pharmacokinetics of the enantiomers following N-acetyl-L-** 244 **leucine administration**

245 For oral dosing with purified N-acetyl-L-leucine, the commercial source of this was found to  
246 contain 97.4% L-enantiomer and 2.6% of the D-enantiomer (S1 Fig). This trace  
247 contamination enabled us to evaluate the pharmacokinetics of the D-enantiomer at a much  
248 lower dose, and allowed for an internal control and comparator. Following an oral dose of the  
249 purified L-enantiomer at 100 mg/kg and 10 mg/mL, the concentration of the L-enantiomer  
250 was greater at all time points (Fig 3c). Quantitatively, for the D- and L-enantiomers,  
251 respectively, had a  $C_{max}$  of 436 ng/mL versus 16900 ng/mL (Fig 5a and Table 1) and an AUC  
252 of 573 h\*ng/mL and 11400 h\*ng/mL (Fig 5d and Table 1). As with administration with the  
253 racemate (Fig 3a and 3b), after dosing with purified L-enantiomer, the elimination rate was  
254 similar for both enantiomers, indicated by the linear and parallel curves on a semilog graph  
255 (Fig 3d) and was well-fit with a single compartment model giving a  $k_e$  of 1.7 h<sup>-1</sup> for the D-  
256 enantiomer and 2.4<sup>-1</sup> for L-enantiomer (Fig 5c and Table 1), with corresponding  $T_{1/2}$  values  
257 of 0.25 h and 0.29 h (Fig 5e and Table 1). Both enantiomers remained detectable in the  
258 plasma until 8 h and 6 h (Fig 5g) with a last concentration of 16 ng/mL and 168 ng/mL (Fig  
259 5f). However, the  $C_{last}$  and  $T_{last}$  are somewhat misleading for all measurements, as in looking  
260 at the profiles, the main elimination was over for all enantiomers at around 2 h when these  
261 terminal concentrations were reached (Fig 3b and 3d).

262

263 **Table 1. The calculated pharmacokinetic parameters for N-Acetyl-D-Leucine and N-**  
264 **Acetyl-L-Leucine plasma after oral administration of N-Acetyl-DL-Leucine or N-**  
265 **Acetyl-L-Leucine at a nominal dose of 100 mg/kg.**

| Compound administered | N-Acetyl-DL-Leucine | N-Acetyl-L-Leucine |
|-----------------------|---------------------|--------------------|
|-----------------------|---------------------|--------------------|

| Compound quantified   | N-Acetyl-D-Leucine |        | N-Acetyl-L-Leucine | N-Acetyl-D-Leucine | N-Acetyl-L-Leucine |
|-----------------------|--------------------|--------|--------------------|--------------------|--------------------|
|                       | Parameter          | Unit   | Value              | Value              | Value              |
| $r^2$                 | -                  | 0.91   | 0.93               | 0.85               | 0.72               |
| $k_e$                 | -                  | 2.2    | 2.8                | 1.7                | 2.4                |
| $T_{max}$             | h                  | <0.25  | <0.25              | <0.25              | <0.25              |
| $C_{max}$             | ng/mL              | 86 100 | 3410               | 436                | 16 800             |
| $T_{last}$            | h                  | 8.00   | 2.00               | 8.00               | 6.00               |
| $C_{last}$            | ng/mL              | 247    | 623                | 16.2               | 168                |
| $T_{1/2}$             | h                  | 0.31   | 0.4                | 0.25               | 0.29               |
| $AUC_{0-last}$        | h*ng/mL            | 57 800 | 2 560              | 573                | 11 400             |
| Ratio $C_{max}$ L/D # | -                  | 0.04   |                    | 38.5               |                    |
| Ratio AUC L/D #       | -                  | 0.04   |                    | 19.8               |                    |

266 #The ratio of corresponding value between L and D enantiomers

267

## 268 **Dose proportionality is greater than unity**

269 Dose proportionality refers to the effect of an increase in dose on  $C_{max}$  and AUC [20]. We can  
 270 assess dose proportionality with our data by using the amount of each enantiomer present in  
 271 the composition administered. The D-enantiomer was dosed as 50% of the administered  
 272 racemate and as 2.6% of the administered purified L-enantiomer, for a difference in dose  
 273 proportionality of 19-fold. The actual dose proportionality was 197-fold for  $C_{max}$  (86100/436;  
 274 Table 1) and 101 fold for AUC (57800/573; Table 1). The L-enantiomer was dosed as 50% of  
 275 the administered racemate and 97.4% of the administered purified L-enantiomer, for a  
 276 difference in dose proportionality of 1.9-fold. The actual dose proportionality was 4.9-fold  
 277 for  $C_{max}$  (16800/3410; Table 1 and Fig 5j) and 4.6 fold for AUC (11400/2560; Table 1 and  
 278 Fig 5j).

279

## 280 **Direct comparison of enantiomers highlights pharmacokinetic** 281 **differences**

282 To facilitate comparison of the racemate with the purified L-enantiomer, we re-plotted the  
283 plasma concentration versus time profiles of the two enantiomers on the same graph over the  
284 first two hours (Fig 4). The amount of D-enantiomer was the plasma is significantly higher  
285 when dosed with the racemate compared to the much lower amount present when dosed with  
286 purified L-enantiomer, and is consistent with the measured 2.6% D contamination in the  
287 purified L-enantiomer (S1 Fig). The semilog plot nicely shows the equal rates of elimination  
288 at all concentrations and times, demonstrating that the D-enantiomer is not affected by dosing  
289 with either the DL or L form. As would be expected with administering a 97.4% to 2.6%  
290 mixture of N-acetyl-L-leucine to N-acetyl-D-leucine, the L-enantiomer dominated in the  
291 plasma (Fig 4a and 4b). Administration of DL or L alone only affected  $C_{max}$  and AUC, but  
292 did not affect elimination ( $k_e$  or  $T_{1/2}$ ). Plotting the L-enantiomer in the plasma on the same  
293 graph to compare dosing with DL with L alone (Fig 4c), graphically shows the dramatic  
294 differences in  $C_{max}$  and AUC, but show the same rate of elimination (parallel curves when fit  
295 to a noncompartmental model).

296

297 **Fig 4. Replots of the data to facilitate direct comparison of the plasma concentration of**  
298 **N-acetyl-leucine enantiomers after oral administration of racemic N-acetyl-DL-leucine**  
299 **or purified N-acetyl-L-leucine.** Data are presented as (a,c) linear-linear plots or (b,d)  
300 semilog plots. Values are the mean  $\pm$  standard error of the mean with  $n = 3$  (mice).

301

302 Another way to compare administration of the racemate compared to the purified L-  
303 enantiomer on the pharmacokinetics of the enantiomers was to calculate the ratio of  
304 enantiomers in regard to  $C_{max}$  and AUC. As we verified the administered compound to be a  
305 true racemate (50% each enantiomer; S1 Fig), deviations from a ratio of 1 reveal significantly  
306 different pharmacokinetics between the D- and L-enantiomers. When administered as the

307 racemate, the ratio of D/L enantiomer was about 25 for both  $C_{\max}$  (Fig 5h; 26 versus 1,  $p =$   
308 0.014) and AUC (Fig 5i, 25 vs 1,  $p = 0.015$ ). As the purified L-enantiomer administered  
309 contained 97.4% L-enantiomer and 2.6% D-enantiomer (S1 Fig), if the enantiomers had  
310 identical pharmacokinetics, the ratio of L/D would be predicted to be 36 (that is,  $97.4/2.6$ ).  
311 When administered as the purified L-enantiomer, the ratio of L/D was 32 for  $C_{\max}$  (Fig 5h;  
312 31.7 versus 36,  $p = 0.17$ ) and 20 for AUC (Fig 5i; 19.8 versus 36,  $p = 0.006$ ).

313

### 314 **Enantiomers show differences in distribution and metabolism**

315 To investigate the effect of administering either the racemate or purified L-enantiomer of N-  
316 acetyl-leucine on the distribution of the enantiomers, muscle and brain were analysed. At  
317 specific times after oral dosing, the mice were euthanized and the amount of D- and L-  
318 enantiomer present in the tissues was determined. Following oral dosing with the racemate,  
319 muscle contained much more D-enantiomer than L-enantiomer (Fig 6a). In muscle, the D-  
320 enantiomer was only detectable at 30 min and 2 h (Fig 6a). In contrast, following oral dosing  
321 of the L-enantiomer alone, in muscle, the L-enantiomer was not detected at any time point  
322 and the D-enantiomer was detectable but at a much lower concentration (Fig 6c) than after  
323 administration of the racemate (Fig 6a). Neither the D- nor L-enantiomer was detected in  
324 muscle after 2 hours from the time of dosing (Fig 6a and 6c). Following oral dosing with the  
325 racemate, the brain contained detectable D-enantiomer at only the 30 min time point and L-  
326 enantiomer was not detectable at any time point (Fig 6b). Following oral dosing with purified  
327 L-enantiomer, neither of the enantiomers were detected at any time point (Fig 6d).

328

329 **Fig 6. Graphs of the concentration of enantiomers in tissue versus time after**

330 **administration of racemic N-acetyl-DL-leucine or purified N-acetyl-L-leucine. Data are**

331 for (a,b) muscle and (c,d) brain and presented as linear-linear plots. Values are the mean  $\pm$   
332 standard error of the mean with  $n = 3$  (mice).

333

334 We investigated the identity of the metabolites of both enantiomers in muscle, but no  
335 metabolites of either N-acetyl-D-leucine or N-acetyl-L-leucine were detected (data not  
336 shown).

337

## 338 **Discussion**

339 We investigated the pharmacokinetics of the enantiomers of N-acetyl-leucine after oral  
340 administration of the racemate, which has been marketed under the name Tanganil<sup>®</sup> for the  
341 treatment of vertigo in France since 1957 [15], and the purified L-enantiomer, which is the  
342 pharmacologically active enantiomer in models of acute vertigo [16,17]. We report  
343 significant and unexpected differences in the pharmacokinetics of the enantiomers. The major  
344 findings of this study are as follows: First, when administered as the racemate (N-acetyl-DL-  
345 leucine), the D-enantiomer was present at much higher plasma maximal concentration ( $C_{max}$ )  
346 and (area under the curve; AUC) relative to the L-enantiomer, resulting in greater total  
347 exposure. Second, when administered as purified N-acetyl-L-leucine, both the  $C_{max}$  and the  
348 AUC for N-acetyl-L-leucine were higher compared to administration as the racemate, even  
349 when scaled for the relative dose. Third, both enantiomers distributed to the tissues  
350 monitored, muscle and brain, but the D-enantiomer was found at much higher concentrations  
351 relative to the L-enantiomer in both tissues.

352

## 353 **Origin of the differences in $C_{max}$ and AUC**

354 The larger AUC for N-acetyl-L-leucine when administered as the purified enantiomer  
355 compared to when administered as the racemate, and factoring in the actual amounts of L-  
356 enantiomer present in each (that is, 97.6% and 50%, respectively), is fully accounted for the  
357 by increase in  $C_{\max}$  because after  $C_{\max}$  and  $T_{\max}$ , the clearance ( $k_e$  and  $T_{1/2}$ ) is the same for  
358 both enantiomers. In other words, after 15 min, the pharmacokinetic parameters are the same  
359 for both enantiomers. Therefore, the large differences in  $C_{\max}$  have to be due to processes  
360 occurring in the first 15 min and before the L-enantiomer enters the plasma. Consequently,  
361 we can deduce that the D-enantiomer is interfering with the bioavailability (the amount of  
362 drug orally administered that is systemically available) of the L-enantiomer during the first  
363 15 min following oral administration. Differences between enantiomers indicate interaction  
364 with protein targets; therefore, two possible explanations that are not mutually exclusive  
365 exist: competition at a carrier on cells in the intestine and/or differences in first-pass  
366 metabolism.

367

### 368 **Stereoisomer-mediated pharmacokinetics arising from uptake**

369 The bioavailability of a drug is determined by its ability to penetrate and cross the  
370 gastrointestinal epithelial cell membrane, either by passive diffusion or via a carrier. Uptake  
371 by passive diffusion is determined by physicochemical properties, primarily hydrophobicity,  
372 which allows penetration of the membrane's core [21,22]. The N-acetylation of leucine  
373 would be predicted to greatly increase passive membrane transport, as it eliminates one  
374 ( $\text{NH}_3^+$ ) of the two ( $\text{NH}_3^+$  and  $\text{COO}^-$ ) charges present on all amino acids at physiological pH,  
375 which can increase transport rates up to  $10^{10}$ -fold [23,24]. However, as this physicochemical  
376 effect (loss of charge and increase in hydrophobicity) is identical for the enantiomers, it  
377 cannot underlie the differences observed in the pharmacokinetics of the N-acetyl-leucine  
378 enantiomers. In contrast, uptake by carriers requires molecular recognition at saturable



379 binding sites and would give rise to interference between the enantiomers. The identity of the  
380 carrier for N-acetyl-leucine on the intestinal brush-border membrane is unknown; however,  
381 given that N-acetyl-leucine is a modified amino acid, the most likely candidates are amino  
382 acid transporters, as 52 families exist that show distinct substrate selectivity [25–27]. These  
383 possibilities can be narrowed down further based on the effect of N-acetylation, which forms  
384 an amide bond (Fig 1). An amide bond would both make N-acetyl-leucine appear more like a  
385 dipeptide and, through resonance, given the C-N bond partial double bond character with a  
386 bond order 1.5 [28], making it an analogue of an imine (Fig 1b). These predict that N-acetyl-  
387 leucine would be a substrate for the low affinity/high capacity a H<sup>+</sup>-coupled di/tripeptide  
388 transporter termed PepT1, which is highly expressed and responsible for 80% of all amino  
389 acids are taken up from the small intestine lumen, or an imino acid transporter which has  
390 100-fold greater affinity for N-modified amino acids and shows only 2-fold stereoselectivity  
391 [29].

392

### 393 **Stereoisomer-mediated pharmacokinetics arising from first-pass** 394 **metabolism**

395 Another likely contributing process accounting for the differences between enantiomers in  
396 C<sub>max</sub> and AUC is first-pass metabolism [18]. As first-pass metabolism is an enzymatic  
397 process, it exhibits molecular recognition at saturable binding sites and would also give rise  
398 to interference between the enantiomers. Such stereoselective first-pass effects are known to  
399 alter oral drug bioavailability of the enantiomers of propranolol and verapamil [19,30].  
400 Indeed, the 2-3-fold stereoisomer effect we detected for N-acetyl-leucine is similar to the 2-3  
401 fold greater oral bioavailability of (–)-verapamil compared to (+)-verapamil caused by first-  
402 pass metabolism [19]. Most often first-pass metabolism is mediated by cytochrome P-450  
403 oxidation in the stomach, intestine or liver [18]; however, N-acetyl-L-leucine is more likely

404 handled like a nutrient than a xenobiotic, as it is a naturally occurring metabolite of L-leucine  
405 and a transacetylase has been reported that interconvert N-acetyl-L-leucine and L-leucine,  
406 using other L-amino acids as the substrate or product [31,32]. Therefore, a likely enzyme for  
407 first-pass metabolism of N-acetyl-L-leucine would be the acylase reported in intestinal strips  
408 that was able to remove the acetyl group from most amino acids [33], and showed 40,000-  
409 fold selectivity for L-amino acids over D-amino acids [31,32,34].

410

### 411 **Stereoisomer effects manifested by tissue uptake and metabolism**

412 In regard to the presence of the enantiomers in muscle and brain, the amounts were much  
413 lower than in the plasma (10-fold to undetectable), and the D-enantiomer was present at a  
414 much higher concentration than the L-enantiomer. In general, our results showing that N-  
415 acetyl-leucine is blood-brain barrier permeable are consistent with studies in monkeys in  
416 which radioactive racemic N-acetyl-leucine was administered intravenously and radioactivity  
417 was subsequently detected in the brains [35]. However, the <sup>14</sup>C label was in the alpha carbon  
418 of leucine and autoradiography was used for quantification, so there is no ability to determine  
419 whether the radioactivity was due to N-acetyl-DL-leucine itself or a metabolite [35].

420 Therefore, the data with radioactivity is ambiguous in terms of both the effect of  
421 stereoisomerism and whether N-acetylation promotes uptake and whether it is rapidly  
422 metabolized to L-leucine.

423

424 In contrast to the situation with uptake from the gut to the plasma in which the D-enantiomer  
425 was reducing uptake, in muscle and brain, the presence of the D-enantiomer was associated  
426 with increased presence of N-acetyl-L-leucine. Uptake from the plasma into cells and tissues,  
427 as described for the intestinal cells above, occurs through both passive diffusion and carriers.  
428 The explanation of competitive inhibition for a common carrier used for the asymmetry in

429 uptake between the enantiomers into the plasma of competition cannot explain this  
430 observation. Indeed, such an effect would result in less of the L-enantiomer, not more, when  
431 N-acetyl-D-leucine was also present. A more likely explanation is competitive inhibition of  
432 the enantiomers at an enzyme that metabolizes N-acetyl-L-leucine. A likely explanation is  
433 that the D-enantiomer is inhibiting the deacetylation of N-acetyl-L-leucine. It is also  
434 important to note that the amount of N-acetyl-L-leucine in tissues is a steady state measure of  
435 the compound, and relates not to lack of uptake but rather rapid utilization. By comparison,  
436 the D-enantiomer was present in higher amounts, consistent with it being metabolically inert  
437 based on feeding N-acetyl-D-leucine to rats, where it was excreted in the urine unchanged  
438 [32]. The simplest explanation is that the N-acetyl-L-leucine is rapidly converted to L-leucine  
439 and utilized in metabolism. Rapid utilization and metabolism of L-leucine is consistent with  
440 the results of a study using stable isotope-labelled leucine itself upon oral administration [36].  
441 Moreover, our inability to detect metabolites is consistent with the disappearance of N-acetyl-  
442 L-leucine through metabolism to L-leucine, which would be undetectable on the background  
443 of endogenous L-leucine. Slowing the conversion of N-acetyl-L-leucine to L-leucine, and  
444 subsequently its regulatory effect on muscle protein synthesis and oxidative metabolism  
445 [37,38], and possibly impact on its efficacy as a drug. Taken together, these data showing low  
446 amounts of N-acetyl-leucine in the brain and muscle suggest that the mechanism of action of  
447 N-acetyl-L-leucine requires metabolism.

448

## 449 **Clinical implications of stereoselective pharmacokinetics**

450 The different pharmacokinetics of the enantiomers would conceivably result in  
451 disproportionate total exposure (increase in the AUC) to the D-enantiomer when the racemate  
452 is dosed, as the L-enantiomer would be eliminated much faster. Importantly, chronic  
453 treatment with multiple doses over time would cause accumulation in the body of the D-

454 enantiomer of N-acetyl-leucine. Historically, it was presumed that the ‘inactive’ enantiomer  
455 was harmless [12]. Although the N-acetyl-D-leucine is not reported to be toxic, concerns  
456 about the toxicity of D-amino acids in general have been raised as the reason for the original  
457 evolutionary selection and biological presence of D-amino acid oxidase [39,40]. Evidence  
458 that the D-leucine is having a biological effect comes from a report in which low amounts  
459 (about 1/10th of endogenous L-form) of D-leucine suppressed endogenous levels of L-  
460 leucine by almost half [41].

461

## 462 **Conclusions**

463 In conclusion, firstly, the L-enantiomer – which is the pharmacologically active form in  
464 models of acute vertigo – has different pharmacokinetics when administered with the D-  
465 enantiomer as the racemate (N-acetyl-DL-leucine) compared to administration as the purified  
466 L-enantiomer. Secondly, we found evidence for an accumulation of the D-enantiomer, which  
467 would be exacerbated by chronic dosing of the racemate, with unknown and possibly  
468 unwanted deleterious effects on cell function. Thirdly, the results of this study, taken together  
469 with the regulatory guidelines of the FDA [13] and the EMA [14], strongly supports the  
470 research and development of isolated N-acetyl-L-leucine.

471

472

## 473 **Acknowledgements**

474 F.M.P. is a Royal Society Wolfson Research Merit Award holder and a Wellcome Trust  
475 Investigator in Science.

476

## 477 **References**

- 478 1. Vibert N, Vidal PP. In vitro effects of acetyl-DL-leucine (tanganil) on central vestibular  
479 neurons and vestibulo-ocular networks of the guinea-pig. *Eur J Neurosci.* 2001;13:  
480 735–748.
- 481 2. Strupp M, Teufel J, Habs M, Feuerecker R, Muth C, van de Warrenburg BP, et al. Effects  
482 of acetyl-DL-leucine in patients with cerebellar ataxia: a case series. *J Neurol.*  
483 2013;260: 2556–2561. doi:10.1007/s00415-013-7016-x
- 484 3. Feil K, Adrion C, Teufel J, Bösch S, Claassen J, Giordano I, et al. Effects of acetyl-DL-  
485 leucine on cerebellar ataxia (ALCAT trial): study protocol for a multicenter,  
486 multinational, randomized, double-blind, placebo-controlled, crossover phase III trial.  
487 *BMC Neurol.* 2017;17: 7. doi:10.1186/s12883-016-0786-x
- 488 4. Schniepp R, Strupp M, Wuehr M, Jahn K, Dieterich M, Brandt T, et al. Acetyl-DL-leucine  
489 improves gait variability in patients with cerebellar ataxia-a case series. *Cerebellum*  
490 *Ataxias.* 2016;3: 8. doi:10.1186/s40673-016-0046-2
- 491 5. Kalla R, Strupp M. Aminopyridines and Acetyl-DL-leucine: New Therapies in Cerebellar  
492 Disorders. *Curr Neuropharmacol.* 2019;17: 7–13.  
493 doi:10.2174/1570159X16666180905093535
- 494 6. Platt F, Strupp M. An anecdotal report by an Oxford basic neuroscientist: effects of  
495 acetyl-DL-leucine on cognitive function and mobility in the elderly. *J Neurol.* 2016;263:  
496 1239–1240. doi:10.1007/s00415-016-8048-9

- 497 7. Bremova T, Malinová V, Amraoui Y, Mengel E, Reinke J, Kolníková M, et al. Acetyl-dl-  
498 leucine in Niemann-Pick type C: A case series. *Neurology*. 2015;85: 1368–1375.  
499 doi:10.1212/WNL.0000000000002041
- 500 8. Cortina-Borja M, Te Vruchte D, Mengel E, Amraoui Y, Imrie J, Jones SA, et al. Annual  
501 severity increment score as a tool for stratifying patients with Niemann-Pick disease  
502 type C and for recruitment to clinical trials. *Orphanet J Rare Dis*. 2018;13: 143.  
503 doi:10.1186/s13023-018-0880-9
- 504 9. Strupp M, Bayer O, Feil K, Straube A. Prophylactic treatment of migraine with and  
505 without aura with acetyl-DL-leucine: a case series. *J Neurol*. 2019;266: 525–529.  
506 doi:10.1007/s00415-018-9155-6
- 507 10. Testa B. Chiral aspects of drug metabolism. *Trends Pharmacol Sci*. 1986;7: 60–64.  
508 doi:10.1016/0165-6147(86)90255-5
- 509 11. Eriksson T, Björkman S, Höglund P. Clinical pharmacology of thalidomide. *Eur J Clin*  
510 *Pharmacol*. 2001;57: 365–376.
- 511 12. Ariëns EJ. Chirality in bioactive agents and its pitfalls. *Trends Pharmacol Sci*. 1986;7:  
512 200–205. doi:10.1016/0165-6147(86)90313-5
- 513 13. Anonymous. FDA'S policy statement for the development of new stereoisomeric drugs.  
514 *Chirality*. 1992;4: 338–340. doi:10.1002/chir.530040513
- 515 14. Anonymous. Investigation of chiral active substances. European Medicines Agency.  
516 <https://www.ema.europa.eu/en/investigation-chiral-active-substances>. In: European

- 517 Medicines Agency [Internet]. 17 Sep 2018 [cited 15 Jul 2019]. Available:  
518 <https://www.ema.europa.eu/en/investigation-chiral-active-substances>
- 519 15. Neuzil E, Ravaine S, Cousse H. La N-acétyl-DL-leucine, médicament symptomatique de  
520 vertigineux. Bull Soc Pharm Bordx. Bull Soc Pharm Bordx. 2002;141: 15–38.
- 521 16. Günther L, Beck R, Xiong G, Potschka H, Jahn K, Bartenstein P, et al. N-acetyl-L-leucine  
522 accelerates vestibular compensation after unilateral labyrinthectomy by action in the  
523 cerebellum and thalamus. PloS One. 2015;10: e0120891.  
524 doi:10.1371/journal.pone.0120891
- 525 17. Tighilet B, Leonard J, Bernard-Demanze L, Lacour M. Comparative analysis of  
526 pharmacological treatments with N-acetyl-DL-leucine (Tanganil) and its two isomers  
527 (N-acetyl-L-leucine and N-acetyl-D-leucine) on vestibular compensation: Behavioral  
528 investigation in the cat. Eur J Pharmacol. 2015;769: 342–349.  
529 doi:10.1016/j.ejphar.2015.11.041
- 530 18. Lees P, Hunter RP, Reeves PT, Toutain PL. Pharmacokinetics and pharmacodynamics of  
531 stereoisomeric drugs with particular reference to bioequivalence determination. J Vet  
532 Pharmacol Ther. 2012;35 Suppl 1: 17–29. doi:10.1111/j.1365-2885.2012.01367.x
- 533 19. Walle T, Walle UK. Pharmacokinetic parameters obtained with racemates. Trends  
534 Pharmacol Sci. 1986;7: 155–158. doi:10.1016/0165-6147(86)90294-4
- 535 20. Johan G. Pharmacokinetic and Pharmacodynamic Data Analysis: Concepts and  
536 Applications. Fifth. Apotekarsocieteten DW, editor. 2016.

- 537 21. Camenisch G, Folkers G, van de Waterbeemd H. Review of theoretical passive drug  
538 absorption models: Historical background, recent developments and limitations.  
539 Pharm Acta Helv. 1996;71: 309–327. doi:10.1016/S0031-6865(96)00031-3
- 540 22. Missner A, Pohl P. 110 Years of the Meyer–Overton Rule: Predicting Membrane  
541 Permeability of Gases and Other Small Compounds. Chemphyschem Eur J Chem Phys  
542 Phys Chem. 2009;10: 1405–1414. doi:10.1002/cphc.200900270
- 543 23. Chakrabarti AC. Permeability of membranes to amino acids and modified amino acids:  
544 Mechanisms involved in translocation. Amino Acids. 1994;6: 213–229.  
545 doi:10.1007/BF00813743
- 546 24. Stillwell W. Facilitated diffusion of amino acids across bimolecular lipid membranes as a  
547 model for selective accumulation of amino acids in a primordial protocell. Biosystems.  
548 1976;8: 111–117. doi:10.1016/0303-2647(76)90014-9
- 549 25. Kiela PR, Ghishan FK. Physiology of Intestinal Absorption and Secretion. Best Pract Res  
550 Clin Gastroenterol. 2016;30: 145–159. doi:10.1016/j.bpg.2016.02.007
- 551 26. Munck BG. Transport of imino acids and non-alpha-amino acids across the brush-border  
552 membrane of the rabbit ileum. J Membr Biol. 1985;83: 15–24.
- 553 27. Munck LK, Munck BG. Amino acid transport in the small intestine. Physiol Res. 1995;44:  
554 335–346.
- 555 28. Pauling LC. The theory of resonance in chemistry. Proc R Soc Lond Math Phys Sci. 1977;  
556 Available: <https://royalsocietypublishing.org/doi/abs/10.1098/rspa.1977.0143>



- 557 29. Krehbiel CR, Matthews JC. Absorption of Amino Acids and Peptides. In: D’Mello JPF,  
558 editor. Amino Acids in Animal Nutrition. 2nd ed. CABI Publishing; 2003. pp. 41–70.  
559 Available: <https://www.cabi.org/bookshop/book/9780851996547>
- 560 30. Brocks DR. Drug disposition in three dimensions: an update on stereoselectivity in  
561 pharmacokinetics. *Biopharm Drug Dispos.* 2006;27: 387–406. doi:10.1002/bdd.517
- 562 31. Bloch K, Borek E. Biological acetylation of natural amino acids. *J Biol Chem.* 1946;164:  
563 483.
- 564 32. Bloch K, Rittenberg D. The metabolism of acetylamino acids. *J Biol Chem.* 1947;169:  
565 467–476.
- 566 33. Whaler BC. The metabolism of amino-acids by the small intestine. *J Physiol.* 1955;130:  
567 278–290.
- 568 34. Birnbaum SM, Levintow L, Kingsley RB, Greenstein JP. Specificity of amino acid acylases.  
569 *J Biol Chem.* 1952;194: 455–470.
- 570 35. Benard P, Cousse H, Bengone T, Germain C. Autoradiography in brain of *Macaca*  
571 *fascicularis* monkeys after injection of acetyl-DL-leucine [2-<sup>14</sup>C] (Tanganil). *Eur J Drug*  
572 *Metab Pharmacokinet.* 2001;26: 71–76. doi:10.1007/BF03190379
- 573 36. Lee AJ, Beno DWA, Zhang X, Shapiro R, Mason M, Mason-Bright T, et al. A (<sup>14</sup>C)-leucine  
574 absorption, distribution, metabolism and excretion (ADME) study in adult Sprague-  
575 Dawley rat reveals  $\beta$ -hydroxy- $\beta$ -methylbutyrate as a metabolite. *Amino Acids.* 2015;47:  
576 917–924. doi:10.1007/s00726-015-1920-6

- 577 37. Krebs HA. Metabolism of amino-acids: Deamination of amino-acids. *Biochem J.* 1935;29:  
578 1620–1644. doi:10.1042/bj0291620
- 579 38. Matthews DE, Motil KJ, Rohrbaugh DK, Burke JF, Young VR, Bier DM. Measurement of  
580 leucine metabolism in man from a primed, continuous infusion of L-[1-3C]leucine. *Am J*  
581 *Physiol.* 1980;238: E473-479. doi:10.1152/ajpendo.1980.238.5.E473
- 582 39. Khoronenkova SV, Tishkov VI. D-amino acid oxidase: physiological role and applications.  
583 *Biochem Biokhimiia.* 2008;73: 1511–1518.
- 584 40. Zhang G, Sun HJ. Racemization in Reverse: Evidence that D-Amino Acid Toxicity on Earth  
585 Is Controlled by Bacteria with Racemases [Internet]. [cited 15 Jul 2019]. Available:  
586 <https://journals.plos.org/plosone/article?id=10.1371/journal.pone.0092101>
- 587 41. Hasegawa H, Matsukawa T, Shinohara Y, Hashimoto T. Assessment of the metabolic  
588 chiral inversion of D-leucine in rat by gas chromatography-mass spectrometry  
589 combined with a stable isotope dilution analysis. *Drug Metab Dispos Biol Fate Chem.*  
590 2000;28: 920–924.

591

## 592 **Supporting information captions**

593

594 S1 Fig. Chiral high performance liquid chromatography/mass spectrometry analysis showing  
595 separation and quantification of the compounds used in these studies. (a) Spectrum of  
596 racemate. (b) Spectrum of purified N-acetyl-L-leucine. Note that the peak areas are not  
597 directly comparable with concentration due to differences in the extent of ionization of the

598 compound in the mass spectrometers ionization chamber due to relative differences in  
599 aqueous and organic solvent concentrations in the mobile phase at those time points due to a  
600 gradient elution. Therefore, quantification was based on a standard curve specific to each  
601 enantiomer. The result is that the racemate contained 50.2% N-acetyl-D-leucine and 49.8%  
602 N-acetyl-L-leucine. The purified N-acetyl-L-leucine contained 2.6% N-acetyl-D-leucine and  
603 97.4% N-acetyl-L-leucine. The limit of detection and the limit of quantification was,  
604 respectively, 10 ng/mL and 25 ng/mL for N-acetyl-D-leucine, and 25 ng/mL and 50 ng/mL  
605 for N-acetyl-L-leucine.

606 **Additional Information Requested at Submission (not to be**  
607 **included in the manuscript file, but provided during online**  
608 **submission)**

609

## 610 **Competing Interests**

611 MS is Joint Chief Editor of the Journal of Neurology, Editor in Chief of Frontiers of Neuro-  
612 otology and Section Editor of F1000. He has received speaker's honoraria from Abbott,  
613 Actelion, Auris Medical, Biogen, Eisai, Grünenthal, GSK, Henning Pharma, Interacoustics,  
614 Merck, MSD, Otometrics, Pierre-Fabre, TEVA, UCB. He is a shareholder of IntraBio. He  
615 acts as a consultant for Abbott, Actelion, AurisMedical, Heel, IntraBio and Sensorion. GCC,  
616 AG and FP are cofounders, shareholders and consultants to IntraBio. FP is a consultant to  
617 Actelion. IntraBio Ltd is the applicant for patents WO2018229738 (Treatment For Migraine),  
618 WO2017182802 (Acetyl-Leucine Or A Pharmaceutically Acceptable Salt Thereof For  
619 Improved Mobility And Cognitive Function), WO2019078915 and WO2018029658  
620 (Therapeutic Agents For Neurodegenerative Diseases), WO2018029657 (Pharmaceutical  
621 Compositions And Uses Directed To Lysosomal Storage Disorders), and WO2019079536  
622 (Therapeutic Agents For Improved Mobility And Cognitive Function And For Treating  
623 Neurodegenerative Diseases And Lysosomal Storage Disorders).

624

## 625 **Financial Disclosure Statement**

626 This study was financially supported by IntraBio (<https://intrabio.com>). The authors (GCC,  
627 MS, AG and FP) were paid for consultancy work for IntraBio. Authors, acting in their

628 capacity as consultants for IntraBio, played roles in study design, data collection and  
629 analysis, decision to publish, or preparation of the manuscript.

630

## 631 **Author Contributions**

632 Conceptualization: Grant C. Churchill, Antony Galione, Frances Platt.

633 Data curation: Grant C. Churchill

634 Formal analysis: Grant C. Churchill

635 Funding acquisition: Grant C. Churchill, Antony Galione, Frances Platt.

636 Investigation:

637 Methodology: Grant C. Churchill, Antony Galione, Frances Platt.

638 Project administration:

639 Resources:

640 Software:

641 Supervision:

642 Validation:

643 Visualization: Grant C. Churchill

644 Writing – original draft: Grant C. Churchill

645 Writing – review & editing: Grant C. Churchill, Michael Strupp, Antony Galione, Frances

646 Platt.

# Figure 1

**a**

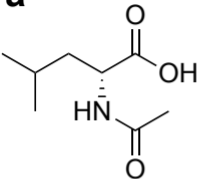

N-acetyl-D-leucine

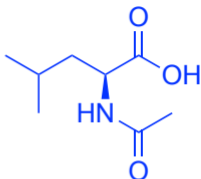

N-acetyl-L-leucine

Racemate

**b**

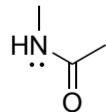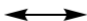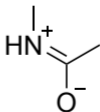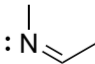

Amide resonance structures

Imine

# Figure 2

Oral administration

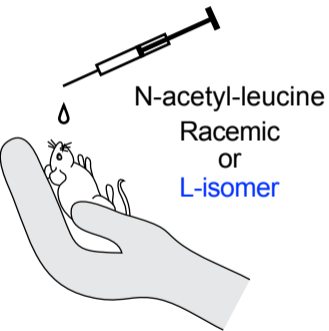

Timed samples

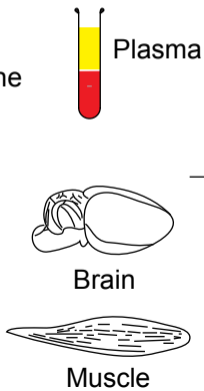

Separation/quantification  
Liquid chromatography

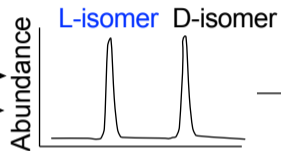

Metabolite identification  
(Mass spectrometry)

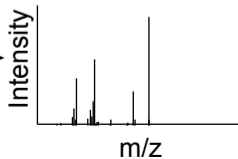

Pharmacokinetic analysis

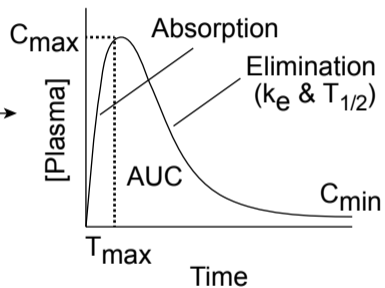

**Figure 3**

Administered

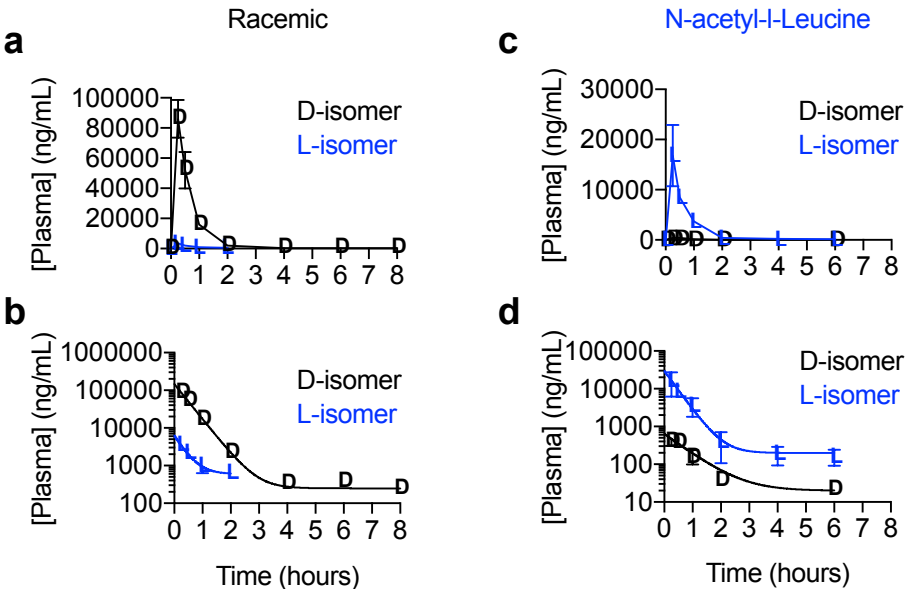



**Figure 4**

Quantified

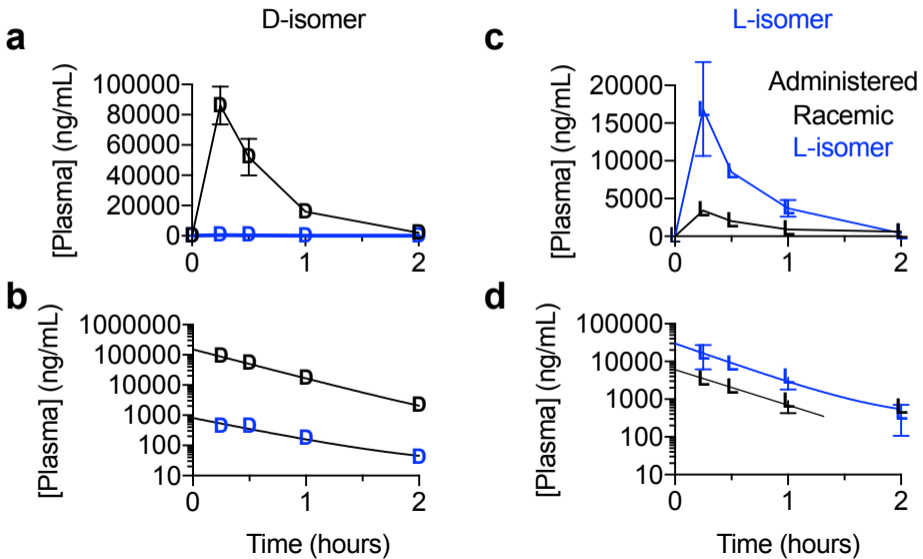

**Figure 5**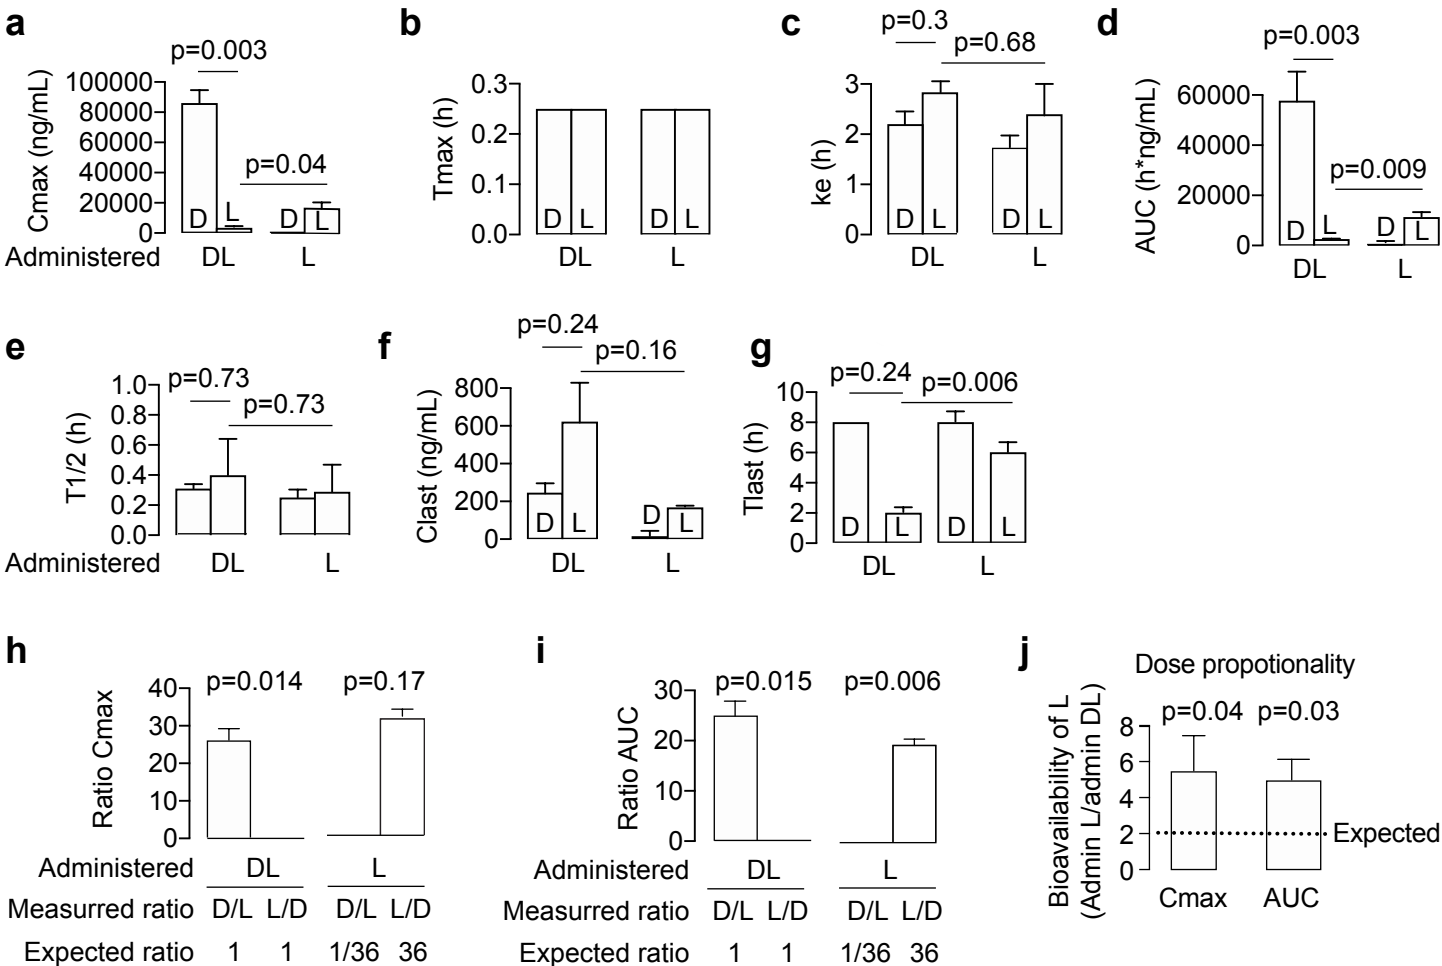

# Figure 6

Administered

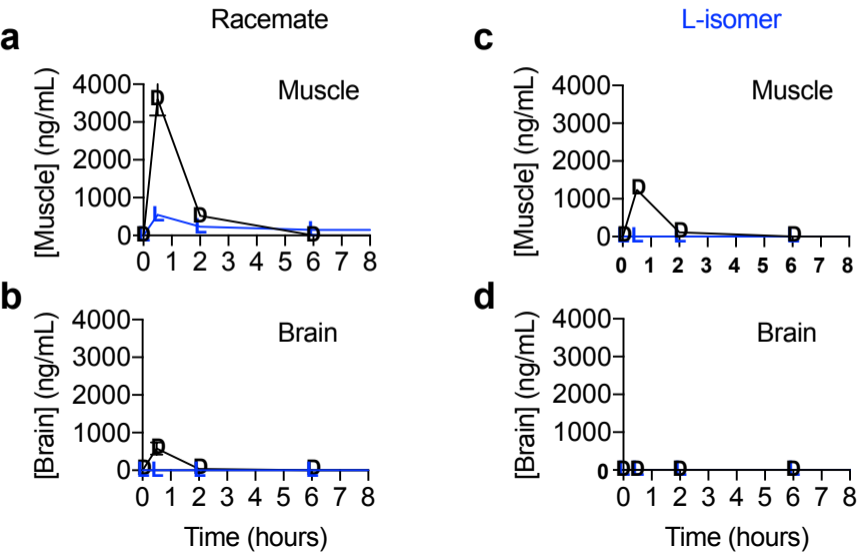

# S1 Fig

**a**

Sample: racemate

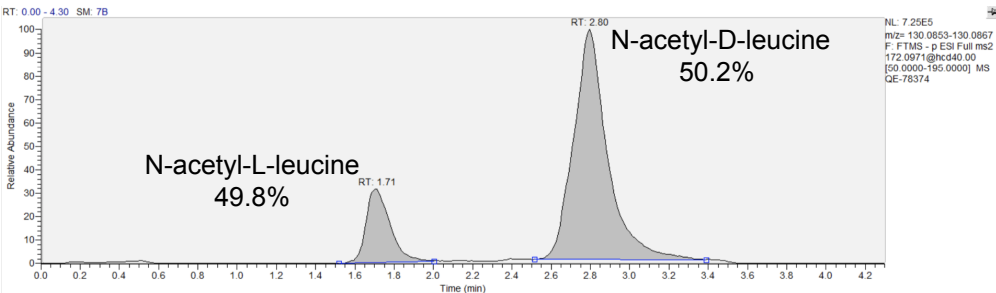

**b**

Sample: purified N-acetyl-L-leucine

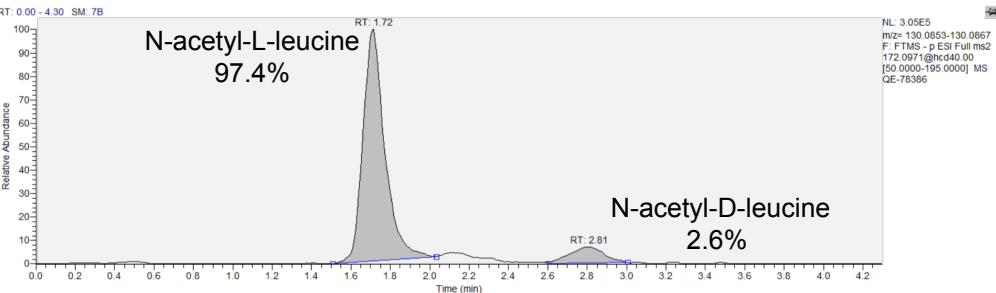

Source: https://www.biorxiv.org/content/10.1101/738286v1.full.pdf
